# 1 **Pathway-specific asymmetries between ON and OFF visual signals**

2

3 Sneha Ravi<sup>1</sup>, Daniel Ahn<sup>2</sup>, Martin Greschner<sup>3</sup>, E.J Chichilnisky<sup>4</sup>, Greg D. Field<sup>1\*</sup>

4

5 1. Department of Neurobiology, Duke University School of Medicine, Durham, NC.

6 2. Systems Neurobiology Laboratory, Salk Institute, La Jolla, CA.

7 3. Department of Biology, University of Oldenburg, Oldenburg Germany

8 4. Departments of Neurosurgery and Ophthalmology, Stanford University, Stanford, CA.

9

10

11 \*Correspondence:

12 Dr. Greg D. Field

13

14 Department of Neurobiology

15 311 Research Drive

16 Duke University

17 Durham, NC, 27710

18 Phone: 919-691-7503

19 Email: [field@neuro.duke.edu](mailto:field@neuro.duke.edu)

## 20 **Abstract**

21 Visual processing is largely organized into ON and OFF pathways that signal stimulus increments  
22 and decrements, respectively. These pathways exhibit natural pairings based on morphological and  
23 physiological similarities, such as ON and OFF alpha ganglion cells in the mammalian retina.  
24 Several studies have noted asymmetries in the properties of ON and OFF pathways. For example,  
25 the spatial receptive fields (RFs) of OFF alpha cells are systematically smaller than ON alpha cells.  
26 Analysis of natural scenes suggests these asymmetries are optimal for visual encoding. To test the  
27 generality of ON-OFF asymmetries, we measured the spatiotemporal RF properties of multiple  
28 RGC types in rat retina. Through a quantitative and serial classification, we identified three func-  
29 tional pairs of ON and OFF RGCs. We analyzed the structure of their RFs and compared spatial  
30 integration, temporal integration, and gain across ON and OFF pairs. Similar to previous results  
31 from cat and primate, RGC types with larger spatial RFs exhibited briefer temporal integration and  
32 higher gain. However, each pair of ON and OFF RGC types exhibited distinct asymmetric rela-  
33 tionships between receptive field properties, some of which were opposite to previous reports.  
34 These results reveal the functional organization of six RGC types in the rodent retina and indicate  
35 that ON-OFF asymmetries are pathway specific.

36

## 37 **Significance Statement**

38 Circuits that process sensory input frequently process increments separately from decrements, so  
39 called ‘ON’ and ‘OFF’ responses. Theoretical studies indicate this separation, and associated  
40 asymmetries in ON and OFF pathways, may be beneficial for encoding natural stimuli. However,  
41 the generality of ON and OFF pathway asymmetries has not been tested. Here we compare the  
42 functional properties of three distinct pairs of ON and OFF pathways in the rodent retina and show  
43 their asymmetries are pathway specific. These results provide a new view on the partitioning of  
44 vision across diverse ON and OFF signaling pathways

## 45 **Introduction**

46 The division of sensory signals across neurons that respond to stimulus increments (ON) or dec-  
47 rements (OFF) is a common processing motif. Examples abound: olfactory receptor neurons in the  
48 cockroach respond to either increments or decrements in odor concentration (Burgstaller and  
49 Tichy, 2011); neurons in auditory cortex respond to increments or decrements of sound intensity  
50 (Scholl et al., 2017); neurons in the fish electrosensory system signal increasing or decreasing  
51 contrasts in amplitude modulations of an electromagnetic field (Berman and Maler, 1998; Clarke  
52 et al., 2014); and neurons from retina to visual cortex respond to increments or decrements of light  
53 intensity (Hartline, 1938; Hubel and Wiesel, 1962). Thus, understanding how and why ON and  
54 OFF pathways partition sensory input is central to an understanding of sensory processing.

55 In vision, the division of sensory processing between ON and OFF pathways is elaborate.  
56 The division originates at the first retinal synapse between photoreceptors and bipolar cells. Within  
57 one additional synaptic layer, the retina partitions visual scenes into 30-40 different channels, each  
58 instantiated by a distinct retinal ganglion cell (RGC) type (Field and Chichilnisky, 2007; Sanes  
59 and Masland, 2015). Many of these RGC types respond to either increments or decrements of light  
60 in their receptive field (RF) center (Hartline, 1938; Kuffler, 1953; Wässle and Boycott, 1991).  
61 Furthermore, many of these ON and OFF RGC types form pairs, such as ON and OFF alpha cells  
62 in cats and other mammals (Cleland and Levick, 1974; Cleland et al., 1975; Watanabe and  
63 Rodieck, 1989; Wässle and Boycott, 1991). These pairings have been established on both morpho-  
64 logical and functional grounds. Morphologically, these pairs have dendritic fields that are similar  
65 in size and branching patterns, but that ramify in different depths of the inner plexiform layer  
66 (Wässle and Boycott, 1991; Dacey, 2004). Functionally, these pairs exhibit similar receptive fields  
67 with a polarity reversal. However, multi-neuron measurements have identified systematic ‘asym-  
68 metries’ between some paired ON and OFF RGC types (Chichilnisky and Kalmar, 2002; Ratliff  
69 et al., 2010). For example, both ON parasol RGCs exhibit larger spatial RFs than their OFF-cell  
70 counterparts. Asymmetries between ON and OFF pathways have also been observed in temporal  
71 integration, contrast response functions, absolute sensitivity, nonlinear spatial integration, and ad-  
72 aptation (Chichilnisky and Kalmar, 2002; Nirenberg et al., 2010; Pandarinath et al., 2010; Ala-  
73 Laurila and Rieke, 2014; Turner and Rieke, 2016).

74           These asymmetries have been studied mostly in alpha and parasol RGCs, which are prob-  
75 ably homologs (Crook et al., 2008a). This raises the question, how ubiquitous are these asymme-  
76 tries? Analysis of natural scenes suggests that RF size asymmetries may be an efficient coding  
77 scheme for natural scenes (Ratliff et al., 2010)(Barlow, 1961; Pandarinath et al., 2010; Karklin and  
78 Simoncelli, 2011). These results suggest asymmetries may be preserved across ON and OFF path-  
79 way pairs. However, these analyses were agnostic to the particular aspects of the visual image  
80 represented by distinct cell types, which may dictate distinct asymmetries (or even symmetry) for  
81 efficient coding.

82           The goal of this study was to measure the organization of RFs across multiple pairs of ON  
83 and OFF RGCs to determine the extent to which asymmetries are general or pathway specific. We  
84 measured the RF properties of hundreds of simultaneously recorded rat RGCs using a multi-elec-  
85 trode array. We developed a procedure for functionally classifying RGCs based on their responses  
86 to diverse visual stimuli. This classification yielded six irreducible cell types -- three pairs of ON  
87 and OFF RGC types. Across three pairs of ON and OFF RGCs from these six types, we found that  
88 the relative organization and the presence of functional asymmetries was pathway dependent. Each  
89 pair exhibited a distinct set of asymmetries in spatiotemporal integration and contrast response  
90 functions. These results indicate that asymmetries between ON and OFF pairs are common, but  
91 that the differences between pairs vary with the cell type and their light response properties.

92

## 93 **Materials and Methods**

### 94 Tissue preparation and MEA Recordings:

95           All experiments followed procedures approved by the Institutional Animal Care and Use  
96 Committee of Duke University and Salk Institute for Biological Studies. Long Evans rats were  
97 euthanized by IP injection of ketamine and xylazine. Retinas were removed in darkness under  
98 infrared illumination with infrared converters as described previously (Anishchenko et al., 2010;  
99 Yu et al., 2017). A ~1.5 x 3 mm segment of dorsal retina centered 3.5-4 mm above the optic nerve  
100 and +/- 1mm along the vertical meridian was isolated. This region of retina was targeted to mini-  
101 mize variability across experiments and to target retinal locations with cones expressing mostly  
102 M-opsin. The retina was placed RGC side down on an electrode arrays consisting of 512 electrodes  
103 at 60  $\mu$ m interelectrode spacing, spanning an area of 0.9 x 1.8 mm (Litke et al., 2004). The voltage  
104 trace recorded on each electrode was bandpass filtered between 80 and 2,000 Hz, sampled at 20

105 kHz, and stored for off-line analysis (Frechette et al., 2005). Spikes were initially sorted by an  
106 automated algorithm and the resulting clusters were checked and corrected manually using custom  
107 spike sorting software (Shlens et al., 2006; Yu et al., 2017). The autocorrelation function of sorted  
108 spikes was used to validate putative RGCs by checking for a refractory period (1.5 ms (Field et  
109 al., 2007)). To track the RGCs across different visual stimuli, spike shapes were sorted in the same  
110 subspace determined by principal components analysis (PCA) of the spike waveforms. Neuron  
111 identity was further confirmed across different stimuli by checking that the electrical image (EI  
112 (Petrusca et al., 2007)) for each neuron matched across conditions. A matched neuron between  
113 two stimulus conditions was determined by the EI pair with the highest inner product across the  
114 two stimulus conditions (Field et al., 2009). A typical experiment resulted in recording and track-  
115 ing the responses of 300-400 RGCs across three visual stimuli.

116

### 117 Visual Stimuli and RGC Response Properties

118 Visual stimuli from a gamma-corrected CRT video display (Sony Trinitron) refreshing at  
119 120 Hz, or an OLED display (Emagine) refreshing at 60 Hz, were focused on the retina via an  
120 inverted microscope (Yu et al., 2017). Two different stimuli were used to measure the functional  
121 properties of recorded RGCs; each was photopic with a mean intensity of either between 3000 or  
122 10,000 photoisomerizations/rod/s (Field et al., 2009; Yu et al., 2017). First, a checkerboard noise  
123 stimulus was used to estimate the spatiotemporal RF by reverse correlation (Chichilnisky, 2001).  
124 Each checker of the noise stimulus was 40x40 microns on the retina and noise images were updated  
125 at 60 Hz. Second, sine wave gratings with a spatial period of 320  $\mu\text{m}$  on the retina were drifted in  
126 8 directions at two speeds (150 and 600  $\mu\text{m}/\text{s}$ ). This stimulus identified RGCs that were sensitive  
127 to motion (Figure 1A) (Yu et al., 2017).

128

### 129 RGC classification

130 RGCs from seven retinas were classified in this study. The number of cells identified for  
131 each type in each retina are provided in Table 1. The classification approach consisted of two  
132 stages: a feature selection process followed by a serial, quantitative classification using unsuper-  
133 vised learning. The feature selection process identified response properties that robustly isolated  
134 one or a small number of RGC types from all other types (e.g. isolating DS-RGCs from nonDS-

135 RGCs, Figure 1A). The quantitative classification clustered neurons using these features by a two-  
136 Gaussian mixture model.

137 *Stage One:* The feature selection process was performed using one of the seven retina re-  
138 cordings in this manuscript. This stage was used to identify response parameters that distinguished  
139 one set of RGCs from all others. In this initial dataset, high-dimensional data was parameterized  
140 and visualized in a lower dimensional space by PCA. These spaces consisted of either two or three  
141 dimensions, each defined by a response parameter such as the overall spike rate or the shape of the  
142 temporal RF (e.g. Figure 1C). Limiting the dimensionality facilitated robustly clustering RGCs  
143 with relatively limited data (e.g. a few hundred RGCs). Once a set of response features were iden-  
144 tified that clearly separated one group of RGCs from the others, the spatial RFs of the grouped  
145 RGC were inspected to check whether they were regularly spaced. If grouped RGCs were regularly  
146 spaced, the features used were saved for quantitative clustering (see Stage Two). Performing fea-  
147 ture selection before quantitative classification improved the performance of the unsupervised  
148 clustering algorithm by minimizing misclassification rates.

149 *Stage Two:* To quantitatively cluster each group of RGCs (Figure 1), a two Gaussian mix-  
150 ture model (GMM) was fit in the same two or three-dimensional feature space defined above in  
151 Stage One. The GMM allowed boundaries to be drawn between clusters according to the maximum  
152 likelihood that RGCs belonged to one Gaussian distribution or the other. RGC types were classi-  
153 fied one at a time in a serial fashion to prevent overfitting and avoid ambiguity in choosing the  
154 right number of clusters. Each cluster was tested for statistical significance (Tukey's range test),  
155 and the irreducibility of each type was verified by testing for a mosaic organization (Figure 3). The  
156 order of this serial classification and the response parameters that consistently identified RGCs  
157 across recordings is shown in Figure 1.

158

### 159 Verifying RGC Types

160 Clustered RGCs were identified as an irreducible cell type by inspecting the normalized  
161 nearest neighbor distribution (NNND; Figure 3) (DeVries and Baylor, 1995; Field et al., 2007).  
162 The NNND is defined as  $2R / (S1 + S2)$ .  $R$  is the distance between the spatial RF of each RGC and  
163 its nearest neighbor's RF.  $S1$  and  $S2$  are SDs of the Gaussian fits for each RGC's spatial RF meas-  
164 ured along the line connecting the centroids. If the two spatial RF 'touch' at the 1-SD contour for  
165 each cell, then the NNND will equal 2.

166 NNNDs indicate a mosaic-like arrangement of RFs when they exhibit a clear exclusion  
167 zone at short nearest-neighbors at distances (Wassle and Riemann, 1978). To test the null hypoth-  
168 esis that the observed NNND were consistent with a random sampling of RGCs, we generated 100  
169 NNND distributions from randomly sampled RGCs within each experiment (Figure 3A). The num-  
170 ber of sampled cells equaled the number of RGCs in the original mosaic. A two-sample Kolmo-  
171 gorov-Smirnov test was used to estimate the probability that the observed NNND was consistent  
172 with that expected from a randomly sampled set of RGCs. In 38 of 42 mosaics tested, the null  
173 hypothesis was rejected with  $p < 0.05$  (Figure 3B).

174

#### 175 Estimation of linear spatiotemporal RFs.

176 A linear approximation to the spatiotemporal RF of each RGC was obtained by reverse  
177 correlation to compute the STA (Chichilnisky, 2001). Frames up to 500 ms preceding a spike were  
178 included in the analysis. The spatial RF was the set of stimulus pixels (stixels) whose absolute  
179 peak intensity exceeded 4.5 robust standard deviations of all pixel intensities (Yu et al., 2017). The  
180 temporal RF was defined as the time-dependent average of these significant stimulus pixels. Once  
181 the temporal RF was computed, the dot product between every stixel of the STA was computed  
182 with the temporal RF. This collapsed the STA across time to a single image, which was used as an  
183 estimate of the spatial RF.

184 This analysis to extract estimates of the spatial and temporal RFs assumes the spatiotem-  
185 poral RF is separable into a single spatial and temporal filter. The validity of this assumption was  
186 examined using singular value decomposition (SVD; (Golomb et al., 1994)). SVD factorizes a  
187 matrix into a rank-ordered set of vector pairs whose outer products are weighted and linearly com-  
188 bined to reproduce the original matrix. A perfectly space-time separable RF will produce a single  
189 pair of non-zero vectors capturing the spatial and temporal RFs respectively. Prior to performing  
190 SVD, a Gaussian spatial filter was applied to the full spatiotemporal RF to reduce noise in the  
191 STA. This Gaussian filter was circular with an SD of 0.75 stixels. After applying this filter, SVD  
192 indicated that across cell types, >90% of the variance in the STA could be captured by the outer  
193 product of a single pair of spatial and temporal filters. This indicates that the linear RF structure  
194 was largely consistent with a space-time separable model.

195

#### 196 Space-time plots

197 To generate average space-time plots of RGC RFs (Figure 5), the entire spatiotemporal RF  
198 was filtered for each cell with a circular Gaussian filter,  $SD = 0.75$  stixels. A  $21 \times 21$  ( $924 \mu\text{m}$   
199  $\times 924 \mu\text{m}$ ) stixel region around the center of mass of the spatial RF was cropped. The average  
200 3-dimensional spatiotemporal RF of each RGC type was computed by averaging together all the  
201 cropped and filtered spatiotemporal RFs of all cells of that type across all recordings. The 3-di-  
202 mensional spatiotemporal RF was collapsed to 2 dimensions by extracting the intensities along  
203 one spatial axis.

204

### 205 Estimation of Contrast response functions

206 Contrast response functions were estimated from the static nonlinearity computed by con-  
207 volving the spatiotemporal RFs with the checkerboard noise stimulus (Chichilnisky, 2001). This  
208 yielded an instantaneous generator signal for each frame of the stimulus that was used to generate  
209 a histogram of observed spike counts for each generator signal. This histogram was fit with a  
210 logistic function. The slope ( $b$ ) and offset ( $a$ ) were parameters from the logistic function fit to the  
211 SNL:  $(c/(1+\exp(-b(x-a))))$ . To check that the static nonlinearity was accurately fit, simulated spikes  
212 were generated from a model Linear-Nonlinear Poisson neuron in response to a checkerboard  
213 white noise stimulus. A logistic function was used in the simulation for the nonlinearity. When  
214 total spike counts were matched between simulated and real neurons, the model fitting produced  
215 estimates of the slope and offset within 1% of the values set in simulation.

216

### 217 Accuracy of the LNP model

218 An important caveat in the RF measurements presented here is that they are linear esti-  
219 mates. These estimates have been shown in some circumstances to accurately capture the stimulus  
220 features that drive RGC spiking (Chichilnisky, 2001; Keat et al., 2001; Pillow et al., 2005). How-  
221 ever, for some RGC types, stimulus features interact nonlinearly in space and/or time (Hochstein  
222 and Shapley, 1976; Schwartz et al., 2012; Freeman et al., 2015). To determine the capacity of these  
223 linear RF estimates and contrast response functions to capture the relationship between the stimu-  
224 lus and spiking, we cross-validated the model to a repeated checkerboard noise stimulus in a subset  
225 of experiments (retinas 2 and 3, Table 1). A 10 s checkerboard noise sequence ( $40 \times 40 \mu\text{m}$  stixels,  
226 60 Hz refresh) was repeated 100 times. For a given RGC, the LNP model generated from the  
227 spatiotemporal RF and static nonlinearities estimated from the non-repeating checkerboard noise



228 was used to predict the response to the repeated checkerboard stimulus (not used in the original  
229 estimate of the STA or static nonlinearity). Across cells of all six types, spike trains generated by  
230 the LNP model captured 51-73% of the explainable variance (data not shown).

231

### 232 Parameterizing stimulus responses

233 *Vector sum for drifting gratings:* The total spike count from RGCs to 8 presentations of a  
234 grating drifting in each of 8 directions was calculated and normalized by the maximum count. This  
235 yielded 8 vectors that had magnitudes ranging between 0 and 1. The sum of these vectors identified  
236 the preferred direction of the RGC (Elstrott et al., 2008; Rivlin-Etzion et al., 2012) and the mag-  
237 nitude of this vector was used to estimate the strength of tuning and classify dsRGCs from non-  
238 dsRGCs in Figure 1A. The vector sum was not normalized to 1 to allow the vector magnitude to  
239 range from zero to infinity. This allowed the Gaussian mixture model to be fit to the log (base 2)  
240 of the vector sum: these distributions were approximately log-normal.

241 *Firing rate for drifting gratings and checkerboard noise:* The firing rates in response to  
242 drifting gratings were calculated by dividing the total spike count by the number of stimulus re-  
243 peats (8), directions (8) and length of time that the grating was presented to the retina (8 or 10 s).  
244 For checkerboard noise, the total number of spikes during the presentation of the checkerboard  
245 noise was divided by the total time.

246 *Parameters of the temporal RF from checkerboard stimuli:* The time-to-peak and time-to-  
247 trough were taken from the global maximum and minimum, respectively, in the temporal RF. The  
248 zero crossing was calculated as the time closest to the spike at which the temporal RF transitioned  
249 from positive to negative values for OFF cells and vice-versa for ON cells. The maximum and  
250 minimum values were taken as the global maximum and minimum in the temporal RF, respec-  
251 tively. A phasic index (PI) was calculated from the temporal RF as the absolute value of the sum  
252 of the positive and negative areas divided by the sum of their absolute values (e.g.  $|a+b| / (|a|$   
253  $+|b|)$ ). The PI ranges from zero to one: zero corresponds to a biphasic temporal RF with the area  
254 above and below zero being equal; one corresponds to a monophasic temporal RF. The biphasic  
255 index (Figure 6D) equaled  $1 - \text{PI}$  (Petrusca et al., 2007).

256 *Parameters of the spatial RF from checkerboard stimuli:* The spatial RF diameter (e.g.  
257 Figure 6A) was defined as the diameter of a circle with the same area as the 1SD boundary of a  
258 two-dimensional Gaussian fit to the RF center (Chichilnisky and Kalmar, 2002; Gauthier et al.,

259 2009). To plot the spatial RF mosaics (e.g. Figure 2A & D), RFs were filtered by convolving with  
260 a two-dimensional Gaussian filter with an SD of 0.75 stixels. Contour lines were then linearly  
261 interpolated in each RF using a fixed contour equivalent to 1 SD, 0.6065 of the peak (Yu et al.,  
262 2017).

263

## 264 **Results**

265 In the following sections, we show the results of a functional classification applied to rat  
266 RGCs recorded on a large-scale MEA. This classification yields a natural set of three pairings  
267 between ON and OFF RGC types. We analyze the spatiotemporal RF properties and gain among  
268 these six cell types and compare the results across ON and OFF pairs.

269

### 270 *The rat retina contains at least three functional pairs of ON and OFF cells*

271 To analyze the RF structure across cell types, we took a serial approach to classifying RGCs  
272 (see Materials and Methods). In the first step, direction selective RGCs were separated from other  
273 cells based on their responses to gratings drifting in different directions and at different speeds  
274 (Figure 1A). In the second step, non-direction-selective RGCs were split into cells with stronger  
275 ON or OFF responses (Figure 1B). The dominant response polarity was determined from the spike-  
276 triggered average (STA) to a checkerboard stimulus (see Materials and Methods). In the third,  
277 fourth and fifth steps, ON and OFF RGCs were serially classified by identifying a small number  
278 of response parameters that clustered RGC types. These response parameters included information  
279 about the mean firing rates, RF size, and duration/kinetics of temporal integration. This approach  
280 yielded three ON and three OFF RGC types.

281 Across these six RGC types, the classification approach indicated a natural set of three  
282 pairs of ON and OFF cell types. For ON and OFF types to be paired, they must resemble one  
283 another more than they resemble other cell types, either morphologically (Wassle et al., 1981a) or  
284 functionally (Devries and Baylor, 1997). This kind of similarity was indicated by two observations.  
285 First, the parameter spaces used to classify ON and OFF RGCs were the same for each pair (Figure  
286 1C-E, steps 3-5). Second, the relative distribution of cells within those parameter spaces were  
287 similar for each pair. These two features ensured that the same response properties segregated each  
288 pair from all other recorded ON and OFF cells and did so in a similar fashion. These are the core  
289 criteria for defining an ON and OFF signaling pair.

290  
 291 The first pair of ON and OFF RGCs  
 292 (Figure 1C, step 3) were distinguished by their  
 293 mean spike rate to a drifting grating, the mean  
 294 response to checkerboard noise, and the ratio  
 295 between the trough and peak of their temporal  
 296 RFs. A low trough-to-peak ratio indicates rel-  
 297 atively monophasic temporal integration and  
 298 a ‘sustained’ responses to steps of light. Thus,  
 299 this first pair of ON and OFF cells exhibited  
 300 the highest firing rates to drifting gratings and  
 301 checkerboard noise, relatively sustained res-  
 302 sponses, and weakly biphasic temporal inte-  
 303 gration.

304 After removing this first pair of classi-  
 305 fied cells, the second pair of ON and OFF  
 306 RGCs were classified in a new parameter  
 307 space that compared spatial RF size, duration  
 308 of temporal integration (time-to-zero), and the  
 309 mean spike rate to checkerboard noise (Figure

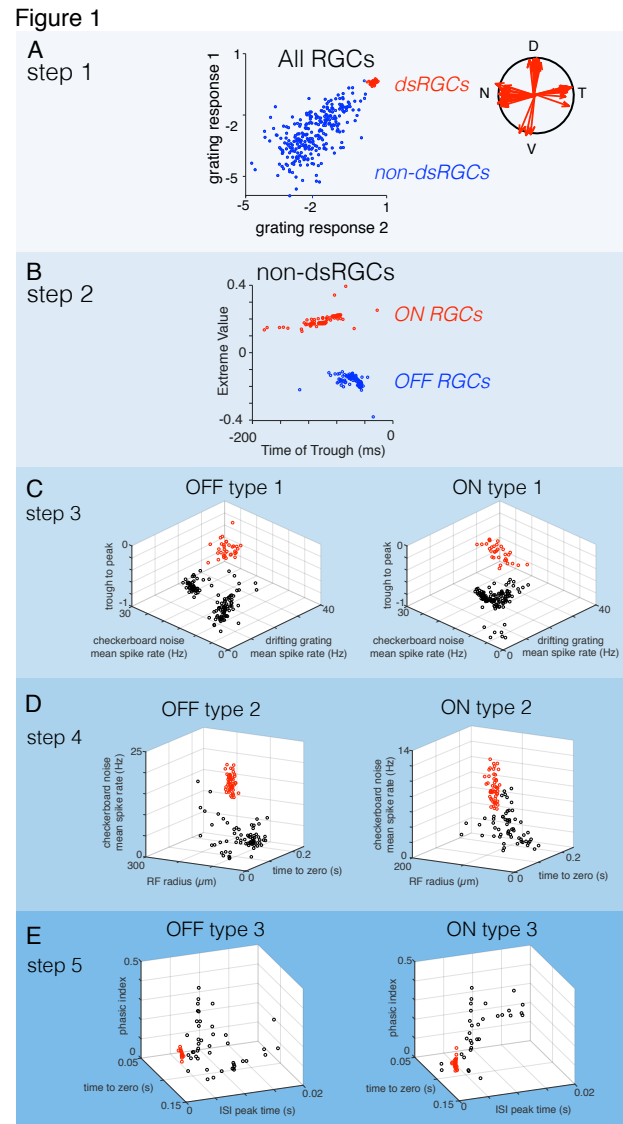

**Figure 1: Serial Classification of RGCs yield three pairs of ON and OFF cells.** **A.** In step 1 of the classification, direction selective RGCs are segregated from all other cells based on their responses to drifting gratings. Grating response 1 and 2 are the natural log of the vector magnitude to a grating with a spatial period of 320  $\mu\text{m}$  drifting at 150 and 600  $\mu\text{m}/\text{s}$ , respectively. Gratings were drifted in 8 directions to estimate the vector magnitudes of their tuning. **B.** In step 2, ON and OFF RGCs were segregated by the value of the extrema and time to trough of their temporal RFs estimated from their STA. **C.** In step 3, a pair of ON and OFF RGCs (red points) were classified from all other ON and OFF cells, respectively. The parameter spaces used to classify these two types were identical and consisted of the mean spike rates to checkerboard noise (stixel size 40x40  $\mu\text{m}$ , 60 Hz refresh) and a drifting grating (spatial period 320  $\mu\text{m}$ , speed, 150  $\mu\text{m}/\text{s}$ ), as well as the trough to peak ratio of their temporal RFs. **D.** In step 4, ON and OFF RGCs identified in step 3 were removed, and the remaining ON and OFF RGCs were classified in a new parameter space defined by the mean spike rate to checkerboard noise, RF radius, and the time to zero of the temporal RF. **E.** In step 5, ON and OFF RGCs identified in the two previous steps were removed and the remaining ON and OFF cells were classified in a new parameter space defined by the phasic index (estimated from the temporal RF, see Materials and Methods), time to zero of the temporal RF, and the peak time of the interspike-interval (ISI) distribution. At each step of the classification, groups of cells were distinguished by a two-Gaussian mixture model.

310 1D). For both ON and OFF RGCs, groups of cells exhibited high firing rates to checkerboard noise  
311 stimuli, large RFs, and brief temporal integration.

312 In the final classification step (Figure 1E), the remaining unclassified RGCs were com-  
313 pared in a parameter space consisting of the time-to-zero of the temporal RF, a phasic index cal-  
314 culated on the temporal RF (see Materials and Methods), and the time of the peak in the interspike  
315 interval (ISI) distribution. Clusters of ON and OFF cells emerged in these spaces with the briefest  
316 ISI peaks, relatively biphasic

317 temporal RFs, and long time-to-  
318 zero crossings.  
319 These classification re-  
320 sults indicated a set of pairings  
321 between ON and OFF RGCs  
322 among the cells identified in our  
323 MEA measurements. In the  
324 subsequent section we examine  
325 whether these cells form irre-  
326 reducible types and compare their  
327 response properties across a  
328 broader range of parameters.

### 330 **Each identified ON and OFF** 331 **cell type forms a mosaic**

332 A hallmark of cell types  
333 in the retina is that they tile

334 space morphologically with dendritic fields and functionally with spatial RFs (Wassle and  
335 Riemann, 1978; Wassle et al., 1981b; Dacey, 1993; Devries and Baylor, 1997; Novelli et al., 2005;  
336 Field and Chichilnisky, 2007). Thus, we tested whether the clusters of ON and OFF cells identified  
337 in our serial classification tiled space to form a mosaic-like pattern with their spatial RFs. We  
338 measured RGC spatial RFs from STAs to checkerboard noise (see Materials and Methods)  
339 (Chichilnisky, 2001; Yu et al., 2017). Plotting the spatial RFs for each RGC type revealed that all  
340 six types exhibited a mosaic-like organization (Figures 2A & D). An analysis of the nearest

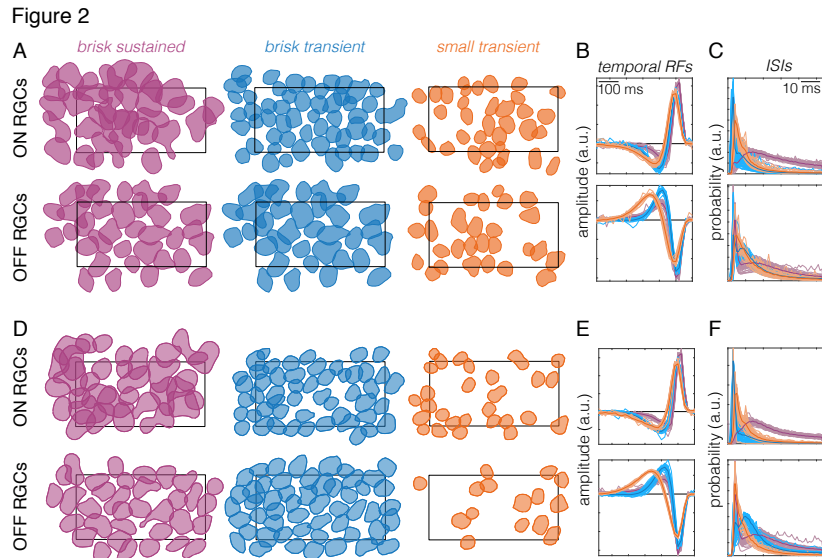

**Figure 2. Classified ON and OFF RGCs exhibit a mosaic-like organization.** **A.** Spatial RFs of ON and OFF brisk sustained (purple), brisk transient (blue) and small transient (orange) RGCs identified in one retina. Spatial RFs are shown as a contour plotted at 0.6065 of the peak amplitude (equivalent to 1 SD of Gaussian). Rectangle shows the outline of the MEA (900 x 1800 μm). **B.** Temporal RFs of all cells shown in A, with ON cells on top and OFF cells on bottom. Thin lines are individual cells, thick lines are mean. Color conventions same as A. **C.** Inter-spike interval (ISI) distributions for all cells in A. Color and line conventions same as A and B. **D-F.** Same as A-C, but for a second retina.

341 neighbor distributions for RGCs of each type revealed non-random spatial RF organizations for  
342 each type across most retinas (Figure 3). Importantly, no information about the spatial location of  
343 cells was used at any step of the classification. Thus, the observation of mosaics is a validation  
344 that the classification yielded irreducible cell types.

345 Another feature of RGC types is that response parameters should vary less within a type  
346 than across types. Thus, we checked that the temporal RFs (reflecting the temporal integration of  
347 visual input) were more similar within a type than across types. Temporal RFs were measured  
348 from the STA time courses to checkerboard noise (see Materials and Methods). Plotting the tem-  
349 poral RFs for all six types revealed highly stereotyped temporal integration within a type and dis-  
350 tinct temporal integration across types (Figures 2B & E). Finally, we compared (ISI) distributions  
351 across types. The ISIs reflect the spiking dynamics of each RGC. Similar to the temporal RFs, the  
352 ISI distributions were more similar within a type than across types for both ON and OFF RGCs  
353 (Figures 2C & F).

354 These features of the six RGC types supported the conclusion that each represented an  
355 irreducible cell type. Henceforth, we refer to the first pair of classified RGCs (Figure 1C) as ON  
356 and OFF brisk sustained RGCs based on their short latency, sustained responses to visual stimuli,  
357 and previously used naming conventions (Caldwell and Daw, 1978; Devries and Baylor, 1997;

358 Girman and Lund, 2010; Heine  
359 and Passaglia, 2011). Similarly,  
360 we refer to the second and third  
361 pairs of classified RGCs (Figures  
362 1D-E) as brisk transient and  
363 small transient RGCs respec-  
364 tively.

365 To further test whether  
366 the pairings of these types was  
367 warranted, we compared the tem-  
368 poral RFs across all six RGC  
369 types in a reduced dimensional  
370 space defined by principal com-  
371 ponents analysis (PCA). ON and

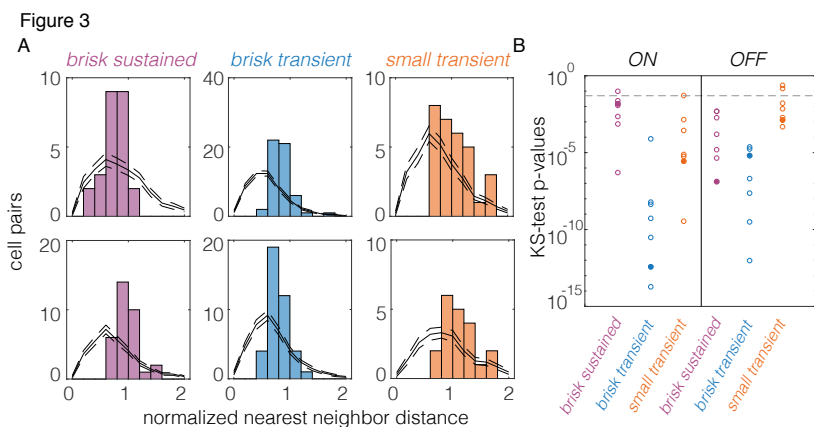

**Figure 3. Normalized nearest neighbor distributions (NNNDs) indicate mosaic-like arrangement of spatial RFs. A.** NNNDs for brisk sustained, brisk transient, and small transient cells, ON cells are top, OFF cells are bottom. Data are from one retina. Black lines show expected NNNDs for randomly sampled cell locations (see Materials and Methods); dashed lines show 95% CI. **B.** P-values from a two-sample Kolmogorov-Smirnov (KS) test for observed NNNDs arising from random cell locations. Fill circles correspond to data shown in A.

372 OFF brisk sustained cells clustered together after accounting for their difference in response po-  
373 larity (Figures 4A & B). Similarly, ON and OFF brisk transient and ON and OFF small transient  
374 cells were more similar to one another, respectively, than to the other identified types. To test that  
375 this particular set of pairings was objectively the best three-group association across all six types,  
376 we fit a three-Gaussian mixture model to the data, using the first five PCs (Figures 4C &  
377 D). The Gaussian mixture model produced an exact match to the three-group description  
378 produced by combining ON and OFF cells across brisk sustained, brisk transient, and  
379 small transient cells (compare Figures 4A with C and B with D). This further supports  
380 the functional pairings established in the serial classification (Figure 1).  
381  
382  
383  
384  
385  
386

### 387 **RGCs with larger spatial integration exhibit briefer temporal integration of visual** 388 **input**

390 We next compared the spatial and temporal integration of visual input across all  
391 six RGC types. Previous studies in primate and cat examining parasol and midget RGCs  
392 or alpha and beta RGCs, respectively, have indicated that spatial and temporal integra-  
393 tion are inversely related (Frishman et al., 1987; Lee, 1996; Troy and Shou, 2002). Here  
394 we examined whether this trend holds in the rodent retina, which has become a dominant  
395 model of visual processing (Huberman and Niell, 2011; Sanes and Masland, 2015).  
396  
397  
398  
399  
400  
401  
402

Figure 4

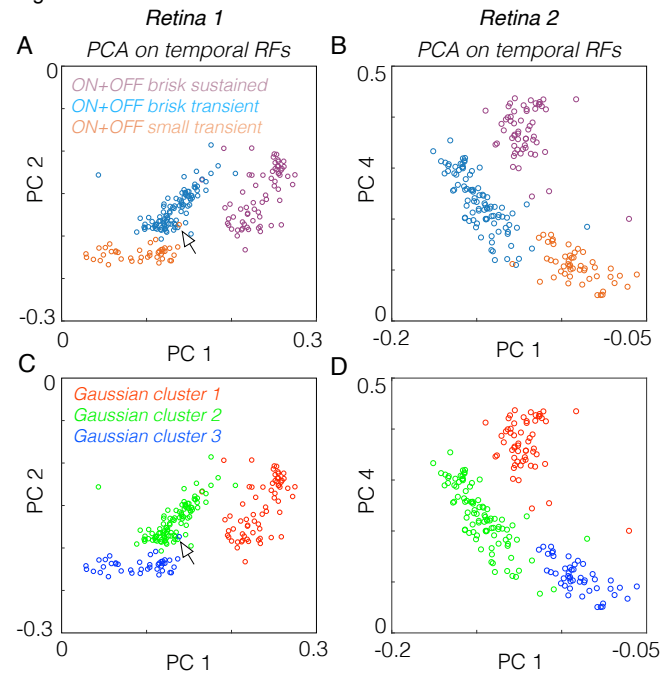

**Figure 4. Temporal RFs of ON and OFF pairs cluster together after accounting for polarity differences.** **A.** PCA applied to the temporal RFs of brisk sustained, brisk transient, and small transient cells from one experiment. The temporal RFs of OFF cells were multiplied by -1 to invert their polarity prior to PCA. Each circle represents one RGC, circles were colored by cell type determined by the classification in Figure 1. **B.** Same analysis as A, but for a second retina and weights associated with PC 4 are plotted instead of PC 2. **C.** Same data as in A, but a three Gaussian mixture model was fit to the data in the space defined by the first 5 principal components, which captured >99% of the variance in the data. This fit finds the best 3-group description of the data (provided each group is well described by a multivariate Gaussian distribution). The Gaussian mixture model clustered the temporal RFs identically to the groupings defined by combining ON and OFF pair together. Even points that appear outside of their appropriate group (see arrowheads) in the two-dimensional plot are correctly classified by the Gaussian mixture

403 type revealed that types with larger RFs exhibited briefer temporal integration (Figures 5A-F).  
404 This relationship held across all seven analyzed retinas (Figure 5G). This comparison assumes that  
405 the spatiotemporal integration performed by each RGC is well captured by a single spatial filter  
406 and a single temporal filter. We checked the degree of independence between the spatial and tem-  
407 poral RFs: where independence is defined as the STA being well-approximated by the outer prod-  
408 uct of a spatial and temporal filter (DeAngelis et al., 1993; Golomb et al., 1994; Cai et al., 1997;  
409 Cowan et al., 2016). Singular value decomposition revealed that for each of the six RGC types we  
410 examined, > 90% of the variance in the STA was captured by the outer product of a single spatial  
411 and temporal filter (not shown). These results indicate that for these RGC types, spatiotemporal  
412 integration was well approximated by a single spatial and temporal filter. Furthermore, in the ro-  
413 dent retina, as in other species, larger spatial integration implies briefer temporal integration.  
414

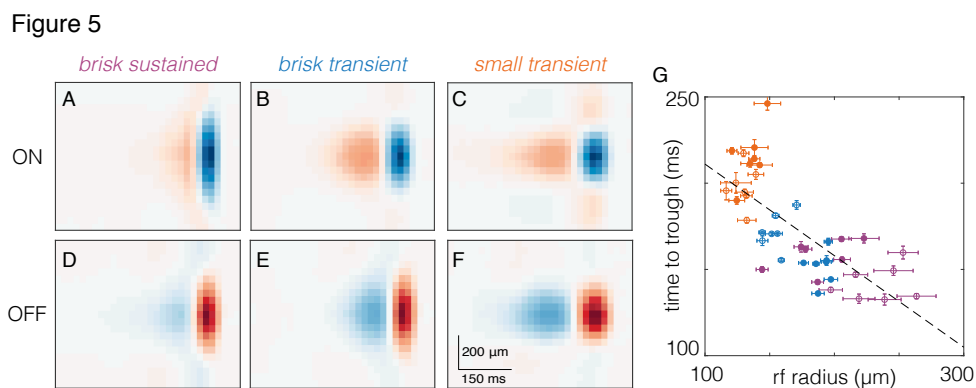

**Figure 5. RGC types with larger spatial RFs exhibit briefer temporal RFs.** A-F. Average space-time RFs from one retina of ON (A-C) and OFF (D-F) brisk sustained, brisk transient, and small transient RGCs. G. Comparison of spatial integration (rf radius) to temporal integration (time to trough). Each point corresponds to one RGC type from one retina, filled (open) symbols are OFF (ON) RGCs. Brisk sustained are purple, brisk transient are blue, and small transient are orange. Dashed line is the best fit line to the data (slope = -0.531, y-intercept = 264.15 ms). Error bars are SE.

#### 415 ON-OFF asymmetries in spatial and temporal integration depend on cell type

416 Previous work has highlighted asymmetries in the size of spatial RFs between ON and OFF  
417 cells, with ON cells having larger RFs (Chichilnisky and Kalmar, 2002; Ratliff et al., 2010). To  
418 test whether this organization is ubiquitous across ON and OFF pathways in the rodent retina, we  
419 compared the size of spatial RFs for each pair of ON and OFF RGC types. Across seven retinas,  
420 ON brisk sustained RGCs exhibited larger spatial RFs than OFF brisk sustained RGCs (Figure 6A,  
421 purple). However, ON and OFF brisk transient RGCs exhibited the opposite relationship (Figure

422 6A, blue). Furthermore, ON and OFF small transient cells exhibited nearly identical RF sizes (Fig-  
423 ure 6A, orange). These comparisons were based on a two-dimensional Gaussian fit to the spatial  
424 RF to identify the radius of a circle with an area equal to that encompassed within one standard  
425 deviation of the RF (see Materials and Methods). To test that this result did not depend on a para-  
426 metric description of the RF, we repeated the comparison for the RF area estimated by the number  
427 of stimulus pixels that drove an appreciable change in firing rate for each RGC (see Materials and  
428 Methods). Qualitatively, the results were unchanged by the non-parametric analysis (Figure 6B).  
429 Thus, previously observed asymmetries do not generalize across cell types.

430 Previous studies have noted asymmetries in the temporal integration between ON and OFF  
431 pathways (Chichilnisky, 2001; Pandarinath et al., 2010) Thus, we next compared the duration of  
432 temporal integration between ON and OFF pairs. The duration of the temporal integration was  
433 estimated by the time-to-zero between the peak and the trough of the temporal RFs. Consistent  
434 with previous results, among brisk sustained RGCs, ON cells exhibited briefer temporal integra-  
435 tion than OFF cells (Figure 6C, purple). However, the opposite was observed for brisk transi-  
436 ent RGCs (Figure 6C, blue). Similar to the results obtained for spatial RFs, ON and OFF  
437 small transient cells exhibited similar durations of temporal integration (Figure 6C, orange).  
438  
439  
440

441 In addition to the duration of temporal integration, RGCs can differ in the dynamics of in-  
442 tegration. A key measure of their temporal dynamics is their biphasic index (a.k.a. degree of  
443 transience). For a shift invariant linear system, the biphasic index indicates key properties of  
444 temporal filtering (e.g. low-pass vs. bandpass)  
445  
446  
447

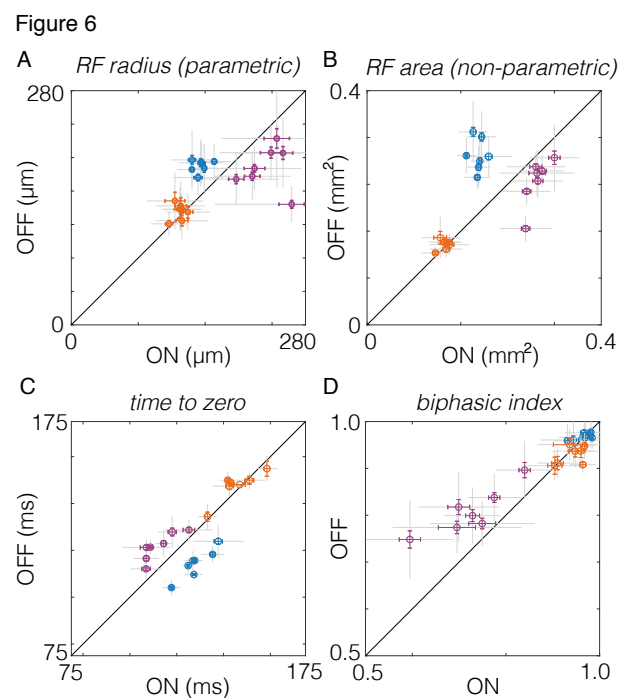

**Figure 6. Comparison of spatial and temporal RF properties between ON and OFF RGC pairs. A.** Spatial RF radii compared between pairs of ON and OFF RGCs. RF radii were derived from a two-dimensional Gaussian fit to the spatial RF. Brisk sustained are purple, brisk transient are blue, and small transient are orange. Each point shows comparison from one retina. Gray error bars show SD, color bars show SE. **B.** Same as A, but compares RF area estimated non-parametrically from the STA (see Materials and Methods). **C.** Comparison of temporal integration estimated from the time to zero of the temporal RF (see Materials and Methods). Comparison of the biphasic index across pairs of ON and OFF RGCs.



448 and it indicates how transient vs. sustained the spiking response will be to a prolonged step in light  
449 intensity (Field et al., 2007; Petrusca et al., 2007). Higher biphasic indices indicate more strongly  
450 bandpass temporal filtering and more transient light responses. Comparing biphasic indices across  
451 ON and OFF pairs, revealed that among brisk sustained RGCs OFF cells exhibited more biphasic  
452 temporal integration than ON cells (Figure 6D, purple). However, biphasic indices were similar  
453 between ON and OFF cells for brisk and small transient RGCs (Figure 6D, blue and orange). These  
454 results indicate that ON-OFF asymmetries in the dynamics of temporal integration are present in  
455 some visual pathways, but not all.

456

### 457 **Asymmetries in linearity, gain and SNR among ON and OFF RGC types**

458 The analyses described above compare the spatial and temporal integration of visual input  
459 between ON and OFF RGC types. However, these analyses do not reveal differences in spiking  
460 output across cell types. The degree of linearity vs. rectification, gain, and signal-to-noise in the  
461 spiking output, are all key features dictating the signals provided to downstream brain areas. Pre-  
462 vious work has noted that OFF cells are more strongly rectified in their spiking output than ON  
463 cells (Chichilnisky and Kalmar, 2002; Zaghloul et al., 2003; Turner and Rieke, 2016), thus path-  
464 way asymmetries may extend beyond the integration of sensory input.

465 To characterize and compare the transformation between visual input and spiking output,  
466 we estimated static nonlinearities that relate the filtered visual stimulus to the number of spikes  
467 produced by each neuron (Figure 7A) (Chichilnisky, 2001). These static nonlinearities can be  
468 thought of as contrast response functions, where contrast is defined as the similarity between the  
469 visual stimulus and the spatiotemporal RF.

470 ON and OFF brisk sustained RGCs exhibited the most linear contrast response functions  
471 (Figure 7A, purple): their spike rates were modulated relatively symmetrically around zero con-  
472 trast. Brisk transient and small transient cells were progressively more rectified in their spike out-  
473 put (Figure 7A, blue and orange). ON and OFF brisk transient cells exhibited the largest changes  
474 in spike rate to large positive or negative contrasts, respectively (Figure 7A, blue).

475 To relate spiking output to RF properties, we compared RF size to the strength of rectification, as  
476 assayed by the NL index, which was computed as the log of the ratios of the slope at the maximum  
477 generator signal to the slope at zero generator signal (Chichilnisky and Kalmar, 2002). This com-  
478 parison revealed that cells with smaller RFs were more rectified in their spiking output than cells

479 with larger RFs (Figure 7B). Because temporal integration was inversely related to spatial integra-  
 480 tion (Figure 5G), longer temporal integration also implied greater rectification in spike output.

481 To test for asymmetries in the spiking output of ON and OFF cell types, we first examined  
 482 NL indices: the logarithm of the ratio of the slope of at the maximum to the slope at zero. For brisk  
 483 sustained and brisk transient RGCs, ON cells had larger NL indices (greater rectification) than  
 484 OFF cells (Figure 7C, purple and blue). However, this relationship was reversed for small transient  
 485 RGCs (Figure 7C, orange). Gain, the log of the slope of the contrast response function at zero contrast,  
 486 was larger among OFF than ON cells for brisk sustained and brisk transient cells (Figure 7D, purple and blue),  
 487 but small transient RGCs exhibited the opposite trend (Figure 7D, orange). Finally, the SNR was compared  
 488 between ON and OFF pathways. The SNR was defined as the gain (Figure 7E) divided by the standard  
 489 deviation of the spike rate at zero contrast (Chichilnisky and Kalmar, 2002). Similar to gain,  
 490 OFF brisk sustained and brisk transient cells exhibited higher SNR than ON cells (Figure 7E, purple and blue),  
 491 but small transient RGCs exhibited the opposite trend (Figure 7E, orange). Cumulatively, these anal-  
 492 yses summarize the relationships in spiking output across three pairs of ON and OFF RGCs and illustrate  
 493 that each pair exhibits a distinct relationship between their degree of linearity, gain and SNR.  
 494  
 495  
 496  
 497  
 498  
 499  
 500  
 501  
 502  
 503  
 504

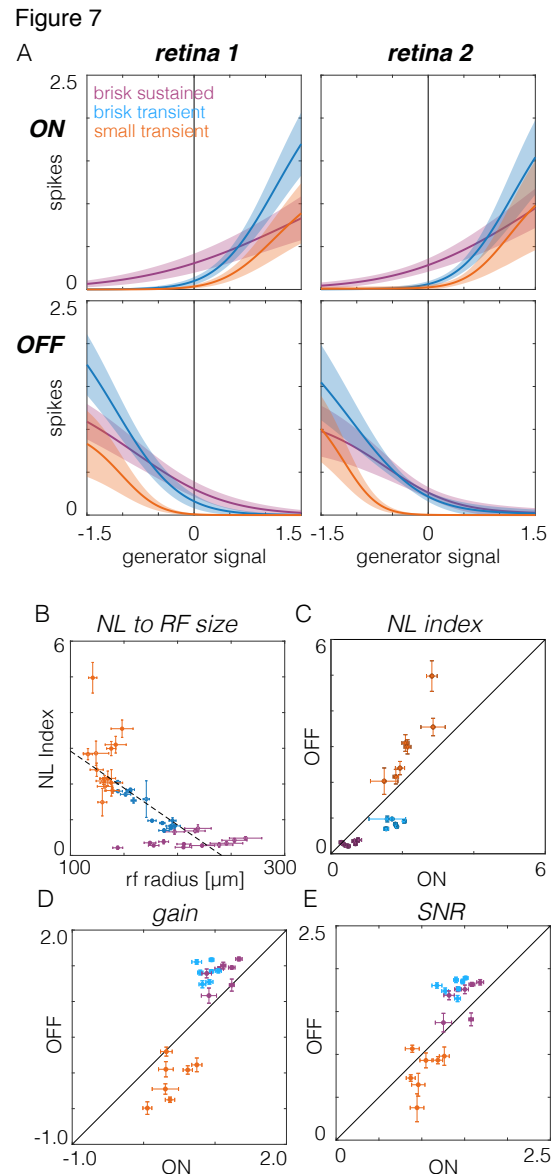

**Figure 7. Comparison of contrast response functions across RGC types.** **A.** Contrast response functions estimated from the static nonlinearities that relate visual stimuli filtered by the spatiotemporal RF to mean spike counts. Left and right show data from two retinas, top and bottom show ON and OFF RGCs, respectively. **B.** Comparison of nonlinearity index to rf radius. Brisk sustained are purple, brisk transient are blue, and small transient are orange. Filled (open) circles are OFF (ON) cells **C.** Nonlinear index compared between pairs of ON and OFF RGCs. **D.** Gain compared between pairs of ON and OFF RGCs. **E.** Signal-to-noise ratio (SNR) compared between ON and OFF pairs.

505

## 506 **Discussion**

507           In this study, we distinguished three functionally matched pairs of ON and OFF cells,  
508 which provided an opportunity to test the extent to which ON-OFF asymmetries generalize across  
509 a greater range of cell types. This comparison results in an expansion of the diversity of asymme-  
510 tries present in the mammalian retina. Asymmetries between ON and OFF brisk sustained cells  
511 were consistent with previous observations. However, ON and OFF brisk transient cells exhibited  
512 asymmetries of opposite polarity and small transient cells exhibited nearly symmetric spatiotem-  
513 poral integration. Thus, our work alters the conventional view that ON and OFF asymmetries are  
514 consistent across diverse RGC types. Below we comment on the method used to classify RGCs in  
515 this study, we suggest correspondences to morphologically defined cell types, and we relate the  
516 RF organization of RGCs in this study to that observed in other species.

517

### 518 ***Functional Classifications of Rodent RGCs***

519           To functionally classify RGCs, we followed the unsupervised classification approach  
520 adopted by several previous studies of RGC diversity (Carcieri et al., 2003; Farrow and Masland,  
521 2011; Baden et al., 2016), with the following differences. The first difference was that RGCs were  
522 classified using data from individual recordings instead of pooling data across recordings. This  
523 reduced the impact of inter-experiment variability which can either blur distinctions between cell  
524 types or cause the identification of too many types. Second, relevant response features that distin-  
525 guished each type were identified before classification. This improved the performance of the  
526 Gaussian mixture model because it produced well-separated clusters, thereby minimizing misclas-  
527 sification rates. Only two or three features were selected at each classification step, which kept  
528 data requirements for classification relatively low. Third, the classification approach was serial.  
529 This mitigated ambiguity in choosing the right number of clusters because each step consisted of  
530 fitting just two clusters to the collection of ON cells and two more clusters to the collection of OFF  
531 cells (Figures 1C-E). Finally, because many RGCs were recorded in each experiment, this allowed  
532 the mosaic arrangement of RFs to provide complementary evidence that the clustered cells were  
533 an irreducible type (Wassle et al., 1981b; Devries and Baylor, 1997; Cook and Chalupa, 2000;  
534 Field and Chichilnisky, 2007; Anishchenko et al., 2010). Cumulatively, this combination of fea-  
535 tures facilitated an analysis of the functional organization of six RGC types.

536 While this approach was reproducible across recordings, it did not classify all recorded  
537 cells, nor did it identify all of the functional types. Given an RGC density of  $\sim 1500$  cells/mm<sup>2</sup> in  
538 the dorsal region of rat retina targeted in these experiments (Danas et al., 2002), 10-15% of RGCs  
539 over the electrode array had well-sorted spikes and were tracked across multiple stimulus condi-  
540 tions, requirements for the data analyzed here. Among recorded RGCs, 37+/-3% were not classi-  
541 fied because too few cells of other types were sampled. Each stimulus used in this study was pre-  
542 sented “full field”, which likely attenuated or silenced spiking in at least some RGC types (e.g.  
543 local-edge detectors; (van Wyk et al., 2006; Zhang et al., 2012)). Moreover, only six irreducible  
544 RGC types were identified. This falls well short of the  $\sim 30$  (possibly 40) functionally distinct types  
545 that likely exist in the mammalian retina (Field and Chichilnisky, 2007; Völgyi et al., 2009;  
546 Sömböl et al., 2014; Sanes and Masland, 2015; Baden et al., 2016). A more complete functional  
547 classification of RGC types will be facilitated by using a wider variety of stimuli and developing  
548 approaches for recording and spike sorting a higher fraction of RGCs over the MEA (Segev et al.,  
549 2004; Prentice et al., 2011; Marre et al., 2012; Yger et al., 2018).

550

### 551 ***Correspondences to morphologically defined RGC types***

552 A major goal in retinal research is to generate a complete catalog of RGCs that specifies  
553 the correspondences between their function, morphology, and projections to the brain (Sanes and  
554 Masland). We did not determine the morphology of the recorded RGCs, however their RF sizes  
555 and response kinetics provide some plausible correspondences. The six RGC types examined here  
556 all had relatively large RFs and large well-isolated spikes on the MEA. These features indicate  
557 large dendritic fields and relatively large somas, suggesting correspondences to the A and C groups  
558 of RGCs identified by Sun and colleagues (Sun et al., 2002). The brisk sustained and brisk transient  
559 cells likely correspond to the delta and alpha cells identified by Peichl (Peichl, 1989). The ON and  
560 OFF small transient cells likely have smaller cell bodies and dendrites in the interior of the IPL  
561 because of their transient response properties (Borghuis et al., 2013), suggesting correspondences  
562 to the outer and inner B1 RGCs (Huxlin and Goodchild, 1997). We emphasize that these are hy-  
563 pothesized correspondences that require additional experiments to test.

564

### 565 ***Diverse contrast response functions across RGC types***

566           The contrast response functions (a.k.a. static nonlinearities) associated with each RGC type  
567 differed significantly across the six types we analyzed (Figure 7). Brisk sustained cells were the  
568 most linear, while small transient cells were the most rectified in their output. This trend was pre-  
569 sent across both ON and OFF types. The degree of rectification in RGC output has been largely  
570 attributed to rectification in the excitatory synaptic inputs provided by bipolar cells (Zaghloul et  
571 al., 2003; Schwartz et al., 2012; Borghuis et al., 2013; Turner and Rieke, 2016). This predicts that  
572 the different bipolar cells feeding these distinct RGC types exhibit differing degrees of rectification  
573 in their output. These differences are likely shaped by inhibitory amacrine cells (Franke et al.,  
574 2017). Importantly, differences in this rectification can play a substantial role in tuning how dif-  
575 ferent cell types respond to natural scenes (Turner and Rieke, 2016).

576           Several recent studies have also examined the benefit of distinct contrast response func-  
577 tions for encoding, and how these functions can be optimized given constraints imposed by differ-  
578 ent sources of noise within the retina. One benefit of diverse contrast response functions for en-  
579 coding is that they could serve to decorrelate a population of neurons responding to complex stim-  
580 uli. This decorrelation can reduce redundancy in the population code, thereby transmitting the  
581 same information with fewer spikes (Barlow, 1961; Vinje and Gallant, 2000; Pitkow and Meister,  
582 2012). Alternatively, different nonlinearities may reflect compensation for noise at different stages  
583 of retinal processing to achieve efficient coding (Brinkman et al., 2016). For example, if the dom-  
584 inant source of noise is present before rectification, the most efficient coding is achieved by rela-  
585 tively linear contrast response functions, while more strongly rectified functions are preferred  
586 when noise dominates after rectification. Determining how the contrast response functions we ob-  
587 served either serve or constrain the encoding of natural scenes across six parallel processing  
588 streams is an important direction for future work.

589

### 590 ***Functional asymmetries among ON and OFF pathways***

591           Asymmetries between ON and OFF pathways have been observed across a range of species  
592 and contexts. Among primate parasol RGCs, ON cells exhibit larger RFs, briefer temporal inte-  
593 gration, and more linear contrast response functions than OFF cells (Chichilnisky and Kalmar,  
594 2002). Some of these asymmetries have been observed in other species and cell types. For exam-  
595 ple, alpha cells in guinea pigs and brisk sustained cells in rabbits exhibit at least some overlapping  
596 asymmetries (Zaghloul et al., 2003; Ratliff et al., 2010; Buldyrev and Taylor, 2013).

597           The mechanisms that produce some of these asymmetries are clear. For example, system-  
598   atic differences in spatial RF size likely reflect systematic differences in dendritic field size be-  
599   tween some ON and OFF RGC types (Peichl et al., 1987; Dacey and Petersen, 1992; Tauchi et al.,  
600   1992; Ratliff et al., 2010). Asymmetries in contrast response functions between ON and OFF alpha  
601   cells reflect differences in baseline transmitter release from presynaptic bipolar cells (Zaghloul et  
602   al., 2003). Furthermore, differences in intrinsic cellular conductances and synaptic inputs conspire  
603   to yield differences in spontaneous firing, spatial nonlinearities, and other properties (Murphy and  
604   Rieke, 2006; Margolis and Detwiler, 2007; Zhang and Diamond, 2009; Buldyrev and Taylor, 2013;  
605   Turner and Rieke, 2016).

606           One question raised by these observations is the extent to which these asymmetries mean-  
607   ingfully shape downstream visual processing and perception. Asymmetries in ON and OFF re-  
608   sponses originating in the retina clearly influence signals in LGN (Jiang et al., 2015), and shape  
609   the responses in primary visual cortex (Yeh et al., 2009; Jin et al., 2011; Komban et al., 2014; Lee  
610   et al., 2016). Furthermore, these asymmetries likely underlie psychophysical asymmetries between  
611   sensing and processing increments versus decrements of light (Pons et al., 2017).

612           Several studies have indicated that ON-OFF asymmetries are optimizations to the statistics  
613   of natural scenes. First, a theoretical analysis indicates that the division of processing ON and OFF  
614   signals transmits more information with fewer spikes than alternative encoding strategies  
615   (Gjorgjieva et al., 2014). Second, the observation that at least some OFF pathways have smaller  
616   RFs than ON cells may allow the retina to transmit more information about natural scenes, which  
617   exhibit more regions of relative darkness (Ratliff et al., 2010). Similarly, several asymmetries can  
618   be predicted by applying efficient coding theory to natural scenes (Karklin and Simoncelli, 2011;  
619   Doi et al., 2012).

620           Given previous work suggests that natural scenes and efficient coding can predict one set  
621   of asymmetries (e.g. ON cells having larger spatial RFs than OFF), why do different pathways  
622   exhibit different asymmetries? One possibility comes from a recent analysis of the spatial fre-  
623   quency distribution of light and dark asymmetries in natural scenes (Cooper and Norcia, 2015).  
624   This work shows that intensity distributions are skewed toward darker values at low spatial fre-  
625   quencies, but not at higher spatial frequencies. This may explain why cell types with the smallest  
626   RFs in this study exhibited nearly equivalent spatiotemporal integration (Figures 6A & B). Two  
627   other considerations may be important as well. First, previous analyses of natural scenes have

628 largely focused on static images, not on natural movies, or movies that consider head and eye  
629 movements. These temporal dynamics may interact with the differences in temporal integration  
630 across RGC types to cause different asymmetries to be optimal. Second, previous analyses have  
631 largely focused on just two pathways, one ON and one OFF (Karklin and Simoncelli, 2011). It is  
632 unclear that the conclusions for encoding natural scenes under this context will generalize if a  
633 system has more pathways to utilize for encoding visual scenes. To resolve these possibilities, a  
634 more complete analysis of the interactions between the natural movies (including head and eye  
635 movements; (Wallace et al., 2013)) and the spatiotemporal dynamics of RGC RFs will be required.

636 **Acknowledgements:** We thank Jon Cafaro, Lindsey Glickfeld, Fred Rieke, and Kiersten Ruda for  
637 comments on the manuscript, and Teleza Westbrook, Alexander Sher, and Alan M. Litke for tech-  
638 nical support. National Institutes of Health and National Eye Institutes R01s EY024567 (G.D.F)  
639 EY021271 (EJC), EY017992 (EJC), P30 EY019005 (EJC), the Karl Kirchgessner Foundation  
640 (G.D.F), the Whitehall Foundation (G.D.F), and the Whitehead Scholars Program (G.D.F).

641 **Declarations of Interests:** The authors have no competing interests.

642 **Author Contributions:** Conceptualization, S.R., E.J.C., G.D.F.; Data Collection, D.A, M.G.,  
643 S.R., G.D.F.; Data Analysis., S.R., D.A., G.D.F., Writing & Editing, S.R., E.J.C., G.D.F.; Super-  
644 vision, G.D.F.; Funding Acquisition, E.J.C., G.D.F.

645

646

647 **Table 1**

| <b>Retina:</b>             | <b>1</b> | <b>2</b> | <b>3</b> | <b>4</b> | <b>5</b> | <b>6</b> | <b>7</b> |
|----------------------------|----------|----------|----------|----------|----------|----------|----------|
| <i>ON brisk sustained</i>  | 33       | 24       | 20       | 26       | 22       | 25       | 38       |
| <i>ON brisk transient</i>  | 51       | 40       | 50       | 39       | 48       | 53       | 37       |
| <i>ON small transient</i>  | 28       | 20       | 23       | 20       | 21       | 30       | 9        |
| <i>OFF brisk sustained</i> | 34       | 27       | 26       | 31       | 33       | 33       | 23       |
| <i>OFF brisk transient</i> | 52       | 30       | 44       | 36       | 37       | 40       | 48       |
| <i>OFF small transient</i> | 15       | 10       | 7        | 10       | 14       | 21       | 12       |

648

649 **Table 1.** RGC counts are provided for the six RGC types identified and examined across the seven  
650 retinal recordings used in this study.

651



652 **Bibliography**

- 653 Ala-Laurila P, Rieke F (2014) Coincidence detection of single-photon responses in the inner  
654 retina at the sensitivity limit of vision. *Curr Biol* 24:2888-2898.  
655
- 656 Anishchenko A, Greschner M, Elstrott J, Sher A, Litke A, Feller M, Chichilnisky E (2010)  
657 Receptive field mosaics of retinal ganglion cells are established without visual  
658 experience. *J Neurophysiol* 103:1856.  
659
- 660 Baden T, Berens P, Franke K, Román Rosón M, Bethge M, Euler T (2016) The functional  
661 diversity of retinal ganglion cells in the mouse. *Nature* 529:345-350.  
662
- 663 Barlow H (1961) Possible principles underlying the transformation of sensory messages. In:  
664 *Sensory Communication* (Rosenblith W, ed), pp 217-234. Cambridge, MA: MIT Press.  
665
- 666 Berman NJ, Maler L (1998) Inhibition evoked from primary afferents in the electrosensory  
667 lateral line lobe of the weakly electric fish (*Apteronotus leptorhynchus*). *J Neurophysiol*  
668 80:3173-3196.  
669
- 670 Borghuis BG, Marvin JS, Looger LL, Demb JB (2013) Two-photon imaging of nonlinear  
671 glutamate release dynamics at bipolar cell synapses in the mouse retina. *J Neurosci*  
672 33:10972-10985.  
673
- 674 Brinkman BA, Weber AI, Rieke F, Shea-Brown E (2016) How Do Efficient Coding Strategies  
675 Depend on Origins of Noise in Neural Circuits? *PLoS Comput Biol* 12:e1005150.  
676
- 677 Buldyrev I, Taylor W (2013) Inhibitory mechanisms that generate centre and surround properties  
678 in ON and OFF brisk-sustained ganglion cells in the rabbit retina. *J Physiol* 591:303-325.  
679
- 680 Burgstaller M, Tichy H (2011) Functional asymmetries in cockroach ON and OFF olfactory  
681 receptor neurons. *J Neurophysiol* 105:834-845.  
682
- 683 Cai D, DeAngelis G, Freeman R (1997) Spatiotemporal receptive field organization in the lateral  
684 geniculate nucleus of cats and kittens. *J Neurophysiol* 78:1045-1061.  
685
- 686 Caldwell J, Daw N (1978) New properties of rabbit retinal ganglion cells. *J Physiol* 276:257-276.  
687
- 688 Carcieri S, Jacobs A, Nirenberg S (2003) Classification of retinal ganglion cells: a statistical  
689 approach. *J Neurophysiol* 90:1704-1713.  
690
- 691 Chander D, Chichilnisky E (2001) Adaptation to temporal contrast in primate and salamander  
692 retina. *J Neurosci* 21:9904-9916.  
693
- 694 Chichilnisky E (2001) A simple white noise analysis of neuronal light responses. *Network:  
695 Computation in Neural Systems* 12:199-213.  
696

- 697 Chichilnisky E, Kalmar R (2002) Functional asymmetries in ON and OFF ganglion cells of  
698 primate retina. *J Neurosci* 22:2737-2747.  
699
- 700 Clarke SE, Longtin A, Maler L (2014) A neural code for looming and receding motion is  
701 distributed over a population of electrosensory ON and OFF contrast cells. *J Neurosci*  
702 34:5583-5594.  
703
- 704 Cleland BG, Levick WR (1974) Brisk and sluggish concentrically organized ganglion cells in the  
705 cat's retina. *J Physiol* 240:421-456.  
706
- 707 Cleland BG, Levick WR, Wassle H (1975) Physiological identification of a morphological class  
708 of cat retinal ganglion cells. *J Physiol* 248:151-171.  
709
- 710 Cook J, Chalupa L (2000) Retinal mosaics: new insights into an old concept. *Trends Neurosci*  
711 23:26-34.  
712
- 713 Cooper EA, Norcia AM (2015) Predicting cortical dark/bright asymmetries from natural image  
714 statistics and early visual transforms. *PLoS Comput Biol* 11:e1004268.  
715
- 716 Cowan CS, Sabharwal J, Wu SM (2016) Space-time codependence of retinal ganglion cells can  
717 be explained by novel and separable components of their receptive fields. *Physiol Rep* 4.  
718
- 719 Crook J, Peterson B, Packer O, Robinson F, Troy J, Dacey D (2008a) Y-cell receptive field and  
720 collicular projection of parasol ganglion cells in macaque monkey retina. *J Neurosci*  
721 28:11277-11291.  
722
- 723 Crook J, Peterson B, Packer O, Robinson F, Gamlin P, Troy J, Dacey D (2008b) The smooth  
724 monostratified ganglion cell: evidence for spatial diversity in the Y-cell pathway to the  
725 lateral geniculate nucleus and superior colliculus in the macaque monkey. *J Neurosci*  
726 28:12654-12671.  
727
- 728 Dacey D (1993) The mosaic of midget ganglion cells in the human retina. *J Neurosci* 13:5334-  
729 5355.  
730
- 731 Dacey D (2004) Origins of perception: retinal ganglion cell diversity and the creation of parallel  
732 visual pathways. In: *The Cognitive Neurosciences* (Gazzaniga MS, ed), pp 281-301.  
733 Cambridge, MA: MIT Press.  
734
- 735 Dacey D, Petersen M (1992) Dendritic field size and morphology of midget and parasol ganglion  
736 cells of the human retina. *Proc Natl Acad Sci U S A* 89:9666-9670.  
737
- 738 Danias J, Shen F, Goldblum D, Chen B, Ramos-Esteban J, Podos SM, Mittag T (2002)  
739 Cytoarchitecture of the retinal ganglion cells in the rat. *Invest Ophthalmol Vis Sci*  
740 43:587-594.  
741

- 742 DeAngelis G, Ohzawa I, Freeman R (1993) Spatiotemporal organization of simple-cell receptive  
743 fields in the cat's striate cortex. II. Linearity of temporal and spatial summation. *J*  
744 *Neurophysiol* 69:1118-1135.  
745
- 746 DeVries S, Baylor D (1995) An alternative pathway for signal flow from rod photoreceptors to  
747 ganglion cells in mammalian retina. *Proc Natl Acad Sci U S A* 92:10658-10662.  
748
- 749 Devries S, Baylor D (1997) Mosaic arrangement of ganglion cell receptive fields in rabbit retina.  
750 *J Neurophysiol* 78:2048-2060.  
751
- 752 Doi E, Gauthier J, Field G, Shlens J, Sher A, Greschner M, Machado T, Jepsen L, Mathieson K,  
753 Gunning D, Litke A, Paninski L, Chichilnisky E, Simoncelli E (2012) Efficient Coding of  
754 Spatial Information in the Primate Retina. *J Neurosci* 32:16256-16264.  
755
- 756 Elstrott J, Anishchenko A, Greschner M, Sher A, Litke A, Chichilnisky E, Feller M (2008)  
757 Direction selectivity in the retina is established independent of visual experience and  
758 cholinergic retinal waves. *Neuron* 58:499-506.  
759
- 760 Farrow K, Masland R (2011) Physiological clustering of visual channels in the mouse retina. *J*  
761 *Neurophysiol* 105:1516-1530.  
762
- 763 Field G, Chichilnisky E (2007) Information processing in the primate retina: circuitry and  
764 coding. *Annu Rev Neurosci* 30:1-30.  
765
- 766 Field G, Sher A, Gauthier J, Greschner M, Shlens J, Litke A, Chichilnisky E (2007) Spatial  
767 properties and functional organization of small bistratified ganglion cells in primate  
768 retina. *J Neurosci* 27:13261-13272.  
769
- 770 Field G, Greschner M, Gauthier J, Rangel C, Shlens J, Sher A, Marshak D, Litke A, Chichilnisky  
771 E (2009) High-sensitivity rod photoreceptor input to the blue-yellow color opponent  
772 pathway in macaque retina. *Nat Neurosci* 12:1159-1164.  
773
- 774 Franke K, Berens P, Schubert T, Bethge M, Euler T, Baden T (2017) Inhibition decorrelates  
775 visual feature representations in the inner retina. *Nature* 542:439-444.  
776
- 777 Frechette E, Sher A, Grivich M, Petrusca D, Litke A, Chichilnisky E (2005) Fidelity of the  
778 ensemble code for visual motion in primate retina. *J Neurophysiol* 94:119-135.  
779
- 780 Freeman J, Field G, Li P, Greschner M, Gunning D, Mathieson K, Sher A, Litke A, Paninski L,  
781 Simoncelli E, Chichilnisky E (2015) Mapping nonlinear receptive field structure in  
782 primate retina at single cone resolution. *Elife* 4.  
783
- 784 Frishman L, Freeman A, Troy J, Schweitzer-Tong D, Enroth-Cugell C (1987) Spatiotemporal  
785 frequency responses of cat retinal ganglion cells. *J Gen Physiol* 89:599-628.  
786

- 787 Gauthier J, Field G, Sher A, Shlens J, Greschner M, Litke A, Chichilnisky E (2009) Uniform  
788 signal redundancy of parasol and midget ganglion cells in primate retina. *J Neurosci*  
789 29:4675-4680.  
790
- 791 Girman S, Lund R (2010) Orientation-specific modulation of rat retinal ganglion cell responses  
792 and its dependence on relative orientations of the center and surround gratings. *J*  
793 *Neurophysiol* 104:2951-2962.  
794
- 795 Gjorgjieva J, Sompolinsky H, Meister M (2014) Benefits of pathway splitting in sensory coding.  
796 *J Neurosci* 34:12127-12144.  
797
- 798 Golomb D, Kleinfeld D, Reid RC, Shapley RM, Shraiman BI (1994) On temporal codes and the  
799 spatiotemporal response of neurons in the lateral geniculate nucleus. *J Neurophysiol*  
800 72:2990-3003.  
801
- 802 Hartline H (1938) The response of single optic nerve fibers of the vertebrate eye to illumination  
803 of the retina. *Am J Physiol* 121:400-415.  
804
- 805 Heine WF, Passaglia CL (2011) Spatial receptive field properties of rat retinal ganglion cells.  
806 *Visual neuroscience* 28:403-417.  
807
- 808 Hochstein S, Shapley R (1976) Linear and nonlinear spatial subunits in Y cat retinal ganglion  
809 cells. *J Physiol* 262:265-284.  
810
- 811 Hubel D, Wiesel T (1962) Receptive fields, binocular interaction and functional architecture in  
812 the cat's visual cortex. *J Physiol* 160:106-154.  
813
- 814 Huberman AD, Niell CM (2011) What can mice tell us about how vision works? *Trends*  
815 *Neurosci* 34:464-473.  
816
- 817 Huxlin K, Goodchild A (1997) Retinal ganglion cells in the albino rat: revised morphological  
818 classification. *J Comp Neurol* 385:309-323.  
819
- 820 Jiang Y, Purushothaman G, Casagrande VA (2015) The functional asymmetry of ON and OFF  
821 channels in the perception of contrast. *J Neurophysiol* 114:2816-2829.  
822
- 823 Jin J, Wang Y, Lashgari R, Swadlow HA, Alonso JM (2011) Faster thalamocortical processing  
824 for dark than light visual targets. *J Neurosci* 31:17471-17479.  
825
- 826 Karklin Y, Simoncelli EP (2011) Efficient coding of natural images with a population of noisy  
827 Linear-Nonlinear neurons. *Adv Neural Inf Process Syst* 24:999-1007.  
828
- 829 Keat J, Reinagel P, Reid R, Meister M (2001) Predicting every spike: a model for the responses  
830 of visual neurons. *Neuron* 30:803-817.  
831

- 832 Kombar SJ, Kremkow J, Jin J, Wang Y, Lashgari R, Li X, Zaidi Q, Alonso JM (2014) Neuronal  
833 and perceptual differences in the temporal processing of darks and lights. *Neuron* 82:224-  
834 234.
- 835
- 836 Kuffler S (1953) Discharge patterns and functional organization of mammalian retina. *J*  
837 *Neurophysiol* 16:37-68.
- 838
- 839 Lee B (1996) Receptive field structure in the primate retina. *Vision Res* 36:631-644.
- 840
- 841 Lee K, Huang X, Fitzpatrick D (2016) Topology of ON and OFF inputs in visual cortex enables  
842 an invariant columnar architecture. *Nature* 533:90-94.
- 843
- 844 Litke A, Bezayiff N, Chichilnisky E, Cunningham W, Dabrowski W, Grillo A, Grivich M,  
845 Grybos P, Hottowy P, Kachiguine S (2004) What does the eye tell the brain?:  
846 Development of a system for the large-scale recording of retinal output activity. *Nuclear*  
847 *Science, IEEE Transactions on* 51:1434-1440.
- 848
- 849 Margolis D, Detwiler P (2007) Different mechanisms generate maintained activity in ON and  
850 OFF retinal ganglion cells. *J Neurosci* 27:5994-6005.
- 851
- 852 Marre O, Amodei D, Deshmukh N, Sadeghi K, Soo F, Holy T, Berry Mn (2012) Mapping a  
853 complete neural population in the retina. *J Neurosci* 32:14859-14873.
- 854
- 855 Murphy G, Rieke F (2006) Network variability limits stimulus-evoked spike timing precision in  
856 retinal ganglion cells. *Neuron* 52:511-524.
- 857
- 858 Nirenberg S, Bomash I, Pillow JW, Victor JD (2010) Heterogeneous response dynamics in  
859 retinal ganglion cells: the interplay of predictive coding and adaptation. *J Neurophysiol*  
860 103:3184-3194.
- 861
- 862 Novelli E, Resta V, Galli-Resta L (2005) Mechanisms controlling the formation of retinal  
863 mosaics. *Prog Brain Res* 147:141-153.
- 864
- 865 Pandarinath C, Victor JD, Nirenberg S (2010) Symmetry breakdown in the ON and OFF  
866 pathways of the retina at night: functional implications. *J Neurosci* 30:10006-10014.
- 867
- 868 Peichl L (1989) Alpha and delta ganglion cells in the rat retina. *J Comp Neurol* 286:120-139.
- 869
- 870 Peichl L, Buhl E, Boycott B (1987) Alpha ganglion cells in the rabbit retina. *J Comp Neurol*  
871 263:25-41.
- 872
- 873 Petrusca D, Grivich M, Sher A, Field G, Gauthier J, Greschner M, Shlens J, Chichilnisky E,  
874 Litke A (2007) Identification and characterization of a Y-like primate retinal ganglion  
875 cell type. *J Neurosci* 27:11019-11027.
- 876

- 877 Pillow J, Paninski L, Uzzell V, Simoncelli E, Chichilnisky E (2005) Prediction and decoding of  
878 retinal ganglion cell responses with a probabilistic spiking model. *J Neurosci* 25:11003-  
879 11013.  
880
- 881 Pitkow X, Meister M (2012) Decorrelation and efficient coding by retinal ganglion cells. *Nat*  
882 *Neurosci* 15:628-635.  
883
- 884 Pons C, Mazade R, Jin J, Dul MW, Zaidi Q, Alonso JM (2017) Neuronal mechanisms underlying  
885 differences in spatial resolution between darks and lights in human vision. *J Vis* 17:5.  
886
- 887 Prentice J, Homann J, Simmons K, Tkacik G, Balasubramanian V, Nelson P (2011) Fast,  
888 scalable, Bayesian spike identification for multi-electrode arrays. *PLoS One* 6:e19884.  
889
- 890 Ratliff CP, Borghuis BG, Kao YH, Sterling P, Balasubramanian V (2010) Retina is structured to  
891 process an excess of darkness in natural scenes. *Proc Natl Acad Sci U S A* 107:17368-  
892 17373.  
893
- 894 Rivlin-Etzion M, Wei W, Feller MB (2012) Visual stimulation reverses the directional  
895 preference of direction-selective retinal ganglion cells. *Neuron* 76:518-525.  
896
- 897 Sanes J, Masland R (2015) The types of retinal ganglion cells: current status and implications for  
898 neuronal classification. *Annu Rev Neurosci* 38:221-246.  
899
- 900 Scholl B, Pattadkal JJ, Rowe A, Priebe NJ (2017) Functional characterization and spatial  
901 clustering of visual cortical neurons in the predatory grasshopper mouse *Onychomys*  
902 *arenicola*. *J Neurophysiol* 117:910-918.  
903
- 904 Schwartz G, Okawa H, Dunn F, Morgan J, Kerschensteiner D, Wong R, Rieke F (2012) The  
905 spatial structure of a nonlinear receptive field. *Nat Neurosci* 15:1572-1580.  
906
- 907 Segev R, Goodhouse J, Puchalla J, Berry M (2004) Recording spikes from a large fraction of the  
908 ganglion cells in a retinal patch. *Nat Neurosci* 7:1154-1161.  
909
- 910 Shlens J, Field G, Gauthier J, Grivich M, Petrusca D, Sher A, Litke A, Chichilnisky E (2006)  
911 The structure of multi-neuron firing patterns in primate retina. *J Neurosci* 26:8254-8266.  
912
- 913 Sümbül U, Song S, McCulloch K, Becker M, Lin B, Sanes J, Masland R, Seung H (2014) A  
914 genetic and computational approach to structurally classify neuronal types. *Nat Commun*  
915 5:3512.  
916
- 917 Sun W, Li N, He S (2002) Large-scale morphological survey of rat retinal ganglion cells. *Vis*  
918 *Neurosci* 19:483-493.  
919
- 920 Takeshita D, Smeds L, Ala-Laurila P (2017) Processing of single-photon responses in the  
921 mammalian On and Off retinal pathways at the sensitivity limit of vision. *Philos Trans R*  
922 *Soc Lond B Biol Sci* 372.

- 923  
924 Tauchi M, Morigiwa K, Fukuda Y (1992) Morphological comparisons between outer and inner  
925 ramifying alpha cells of the albino rat retina. *Exp Brain Res* 88:67-77.  
926
- 927 Troy J, Shou T (2002) The receptive fields of cat retinal ganglion cells in physiological and  
928 pathological states: where we are after half a century of research. *Prog Retin Eye Res*  
929 21:263-302.  
930
- 931 Turner MH, Rieke F (2016) Synaptic Rectification Controls Nonlinear Spatial Integration of  
932 Natural Visual Inputs. *Neuron* 90:1257-1271.  
933
- 934 van Wyk M, Taylor W, Vaney D (2006) Local edge detectors: a substrate for fine spatial vision  
935 at low temporal frequencies in rabbit retina. *J Neurosci* 26:13250-13263.  
936
- 937 Vinje WE, Gallant JL (2000) Sparse coding and decorrelation in primary visual cortex during  
938 natural vision. *Science* 287:1273-1276.  
939
- 940 Völgyi B, Chheda S, Bloomfield S (2009) Tracer coupling patterns of the ganglion cell subtypes  
941 in the mouse retina. *J Comp Neurol* 512:664-687.  
942
- 943 Wallace DJ, Greenberg DS, Sawinski J, Rulla S, Notaro G, Kerr JN (2013) Rats maintain an  
944 overhead binocular field at the expense of constant fusion. *Nature* 498:65-69.  
945
- 946 Wassle H, Riemann H (1978) The mosaic of nerve cells in the mammalian retina. *Proc R Soc*  
947 *Lond B Biol Sci* 200:441-461.  
948
- 949 Wassle H, Boycott B (1991) Functional architecture of the mammalian retina. *Physiol Rev*  
950 71:447-480.  
951
- 952 Wassle H, Peichl L, Boycott B (1981a) Morphology and topography of on- and off-alpha cells in  
953 the cat retina. *Proc R Soc Lond B Biol Sci* 212:157-175.  
954
- 955 Wassle H, Peichl L, Boycott B (1981b) Dendritic territories of cat retinal ganglion cells. *Nature*  
956 292:344-345.  
957
- 958 Watanabe M, Rodieck RW (1989) Parasol and midget ganglion cells of the primate retina. *J*  
959 *Comp Neurol* 289:434-454.  
960
- 961 Yeh CI, Xing D, Shapley RM (2009) "Black" responses dominate macaque primary visual cortex  
962 v1. *J Neurosci* 29:11753-11760.  
963
- 964 Yger P, Spampinato GL, Esposito E, Lefebvre B, Deny S, Gardella C, Stimberg M, Jetter F,  
965 Zeck G, Picaud S, Duebel J, Marre O (2018) A spike sorting toolbox for up to thousands  
966 of electrodes validated with ground truth recordings in vitro and in vivo. *Elife* 7.  
967

- 968 Yu WQ, Grzywacz NM, Lee EJ, Field GD (2017) Cell type-specific changes in retinal ganglion  
969 cell function induced by rod death and cone reorganization in rats. *J Neurophysiol*  
970 118:434-454.  
971
- 972 Zaghloul K, Boahen K, Demb J (2003) Different circuits for ON and OFF retinal ganglion cells  
973 cause different contrast sensitivities. *J Neurosci* 23:2645-2654.  
974
- 975 Zaghloul K, Boahen K, Demb J (2005) Contrast adaptation in subthreshold and spiking  
976 responses of mammalian Y-type retinal ganglion cells. *J Neurosci* 25:860-868.  
977
- 978 Zhang J, Diamond JS (2009) Subunit- and pathway-specific localization of NMDA receptors and  
979 scaffolding proteins at ganglion cell synapses in rat retina. *J Neurosci* 29:4274-4286.  
980
- 981 Zhang Y, Kim I, Sanes J, Meister M (2012) The most numerous ganglion cell type of the mouse  
982 retina is a selective feature detector. *Proc Natl Acad Sci U S A* 109:E2391-2398.  
983
